# Supplementary material for: Different Types of Non-Starch Polysaccharides Alter the Growth, Intestinal Flora and Serum Metabolite Profile of Grass Carp, Ctenopharyngodon idella
Source: MDPI journal article supplement (doi:10.3390/metabo12101003), 2022-10-21
Supplement: s1 [file s1]

**Table S1.** Amino acid profile of test feeds (dry matter, %).

| <b>Group</b> | <b>FM</b> | <b>INSP</b> | <b>SNSP</b> | <b>NSP</b> |
|--------------|-----------|-------------|-------------|------------|
| Arg          | 1.77      | 1.72        | 1.67        | 1.73       |
| His          | 0.77      | 0.81        | 0.77        | 0.75       |
| Ile          | 1.18      | 1.13        | 1.17        | 1.17       |
| Leu          | 1.91      | 1.98        | 2.03        | 2.05       |
| Lys          | 1.87      | 1.90        | 1.86        | 1.86       |
| Met          | 0.81      | 0.79        | 0.82        | 0.81       |
| Phe          | 0.93      | 0.95        | 0.99        | 0.99       |
| Thr          | 1.04      | 1.03        | 1.07        | 1.10       |
| Val          | 1.29      | 1.33        | 1.38        | 1.38       |
| ΣEAA         | 11.57     | 11.64       | 11.76       | 11.84      |
| Glu          | 4.40      | 4.38        | 4.39        | 4.43       |
| Gly          | 0.76      | 0.79        | 0.81        | 0.83       |
| Ala          | 1.69      | 1.74        | 1.79        | 1.81       |
| Tyr          | 0.53      | 0.58        | 0.54        | 0.57       |
| Asp          | 2.83      | 2.80        | 2.83        | 2.92       |
| Ser          | 0.84      | 0.82        | 0.86        | 0.86       |
| Pro          | 1.37      | 1.38        | 1.45        | 1.47       |
| Cys          | 0.32      | 0.32        | 0.34        | 0.34       |
| ΣNEAA        | 12.74     | 12.81       | 13.01       | 13.23      |

**Table S2.** Liquid chromatography mobile phase elution gradient.

| Reagents              | Composition                                                                                    |
|-----------------------|------------------------------------------------------------------------------------------------|
| Mobile phase A liquid | Ultrapure water (Merck, Darmstadt, Germany) + 0.1% Formic acid solution (CNW, Shanghai, China) |
| Mobile phase B liquid | Acetonitrile (Merck, Darmstadt, Germany) + 0.1% Formic acid solution (CNW, Shanghai, China)    |

**Table S3.** Mobile phase elution procedure.

| <b>Time (min)</b> | <b>Flow rate (mL/min)</b> | <b>A (%)</b> | <b>B (%)</b> |
|-------------------|---------------------------|--------------|--------------|
| 0                 | 0.3                       | 95           | 5            |
| 2                 | 0.3                       | 95           | 5            |
| 12                | 0.3                       | 5            | 95           |
| 15                | 0.3                       | 5            | 95           |
| 17                | 0.3                       | 95           | 5            |

**Table S4.** Differential metabolites between FM and INSP groups.

| No.                       | VIP  | Name                                                                      | Molecular Weight | RT [min] | Fold INSP/FM | T test |
|---------------------------|------|---------------------------------------------------------------------------|------------------|----------|--------------|--------|
| <b>Positive ion model</b> |      |                                                                           |                  |          |              |        |
| 1                         | 2.76 | CREATINE                                                                  | 131.0693         | 0.89     | 1.01         | <0.001 |
| 2                         | 2.28 | Phytosphingosine                                                          | 317.2929         | 5.61     | 0.67         | 0.005  |
| 3                         | 2.24 | Xanthine                                                                  | 152.0334         | 1.19     | 0.97         | 0.006  |
| 4                         | 2.22 | DErySphinganine                                                           | 301.2978         | 6.43     | 0.66         | 0.006  |
| 5                         | 2.05 | DL-Histidine                                                              | 155.0695         | 0.99     | 0.78         | 0.013  |
| 6                         | 1.93 | Guanine                                                                   | 151.0492         | 1.21     | 1.39         | 0.021  |
| 7                         | 1.90 | 2-Amino-9-pentofuranosyl-1,9-dihydro-6H-purin-6-one                       | 283.0918         | 1.22     | 1.22         | 0.023  |
| 8                         | 1.88 | DL-Tryptophan                                                             | 204.0891         | 3.38     | 0.67         | 0.025  |
| 9                         | 1.85 | Piperidine                                                                | 85.0890          | 1.40     | 0.54         | 0.028  |
| 10                        | 1.84 | Cortisol                                                                  | 362.2089         | 4.44     | 0.56         | 0.029  |
| 11                        | 1.84 | L-Proline                                                                 | 115.0632         | 0.89     | 0.84         | 0.029  |
| 12                        | 1.81 | Hypoxanthin                                                               | 136.0384         | 1.22     | 0.41         | 0.032  |
| 13                        | 1.80 | afegostat                                                                 | 147.0897         | 1.10     | 0.53         | 0.033  |
| 14                        | 1.73 | L-(+)-Leucine                                                             | 131.0944         | 1.41     | 0.44         | 0.041  |
| 15                        | 1.67 | Phenol                                                                    | 94.0417          | 2.00     | 0.57         | 0.049  |
| <b>Negative ion model</b> |      |                                                                           |                  |          |              |        |
| 1                         | 1.99 | (±)-Malic Acid                                                            | 134.0218         | 0.92     | 0.63         | 0.009  |
| 2                         | 1.83 | Dimethyl fumarate                                                         | 144.0426         | 0.85     | 0.33         | 0.019  |
| 3                         | 1.61 | Valproic acid                                                             | 144.1153         | 4.40     | -0.79        | 0.043  |
| 4                         | 1.59 | (+/-)-Tartaric acid                                                       | 150.0170         | 14.17    | 0.78         | 0.046  |
| 5                         | 2.02 | Xanthine                                                                  | 152.0337         | 1.20     | 0.75         | 0.008  |
| 6                         | 1.76 | 5,6-Dihydroxy-1,3-cyclohexadiene-1-carboxylic acid                        | 156.0425         | 0.91     | 0.75         | 0.025  |
| 7                         | 1.84 | Diethylpyrocarbonate                                                      | 162.0531         | 0.85     | 0.28         | 0.018  |
| 8                         | 1.82 | DL-Phenylalanine                                                          | 165.0791         | 2.00     | 0.44         | 0.020  |
| 9                         | 1.89 | DL-Arginine                                                               | 174.1119         | 0.81     | 0.53         | 0.015  |
| 10                        | 1.57 | Hexose                                                                    | 180.0636         | 0.89     | 0.35         | 0.048  |
| 11                        | 1.63 | ibufenac                                                                  | 192.1150         | 5.88     | 0.88         | 0.040  |
| 12                        | 2.00 | para-Tolyl octanoate                                                      | 234.1620         | 7.59     | 0.40         | 0.009  |
| 13                        | 1.94 | Trolox                                                                    | 250.1204         | 5.59     | 0.49         | 0.012  |
| 14                        | 2.22 | Arabinosylhypoxanthine                                                    | 268.0809         | 0.92     | 0.68         | 0.003  |
| 15                        | 1.73 | 2-Amino-9-pentofuranosyl-1,9-dihydro-6H-purin-6-one                       | 283.0917         | 1.22     | 1.22         | 0.028  |
| 16                        | 1.61 | 10,16-Dihydroxyhexadecanoic acid                                          | 288.2300         | 6.01     | 0.59         | 0.043  |
| 17                        | 1.79 | Ricinoleic Acid                                                           | 298.2506         | 7.97     | 0.32         | 0.022  |
| 18                        | 1.61 | 5,6-Dihydroretinoic acid                                                  | 302.2246         | 7.06     | 0.31         | 0.043  |
| 19                        | 1.82 | Progesterone                                                              | 314.2246         | 7.78     | -0.78        | 0.019  |
| 20                        | 1.62 | icomucret                                                                 | 320.2353         | 7.91     | 0.77         | 0.042  |
| 21                        | 1.91 | (10E)-9,12,13-Trihydroxy-10-octadecenoic acid                             | 330.2404         | 5.24     | 0.78         | 0.014  |
| 22                        | 1.88 | (10E)-9,12,13-Trihydroxy-10-octadecenoic acid                             | 330.2404         | 5.85     | 0.62         | 0.015  |
| 23                        | 1.59 | (10E)-9,12,13-Trihydroxy-10-octadecenoic acid                             | 330.2404         | 5.34     | 0.55         | 0.045  |
| 24                        | 1.68 | 15,16-Epoxy-6b,9-dihydroxy-8bH-labda-13(16),14-dien-19-oic Acid g-Lactone | 332.1984         | 4.44     | 0.59         | 0.033  |
| 25                        | 1.91 | Testosterone decanoate                                                    | 442.3441         | 12.20    | 0.62         | 0.014  |

**Table S5.** Differential metabolites between FM and SNSP groups.

| No.                       | VIP  | Name                                                                        | Molecular Weight | RT [min] | Fold SINSF/FM | T test |
|---------------------------|------|-----------------------------------------------------------------------------|------------------|----------|---------------|--------|
| <b>Positive ion model</b> |      |                                                                             |                  |          |               |        |
| 1                         | 1.51 | Piperidine                                                                  | 85.0890          | 1.40     | 0.62          | 0.011  |
| 2                         | 1.55 | Phenol                                                                      | 94.0417          | 2.00     | 0.80          | 0.009  |
| 3                         | 1.25 | Benzonitrile                                                                | 103.0418         | 3.41     | 0.41          | 0.040  |
| 4                         | 1.39 | Uracil                                                                      | 112.0273         | 1.18     | 0.57          | 0.021  |
| 5                         | 1.43 | Indole                                                                      | 117.0579         | 2.00     | 0.57          | 0.017  |
| 6                         | 1.41 | Nicotinamide                                                                | 122.0480         | 1.19     | 0.68          | 0.019  |
| 7                         | 1.71 | CREATINE                                                                    | 131.0693         | 0.89     | 1.12          | 0.003  |
| 8                         | 1.47 | L-(+)-Leucine                                                               | 131.0944         | 1.41     | 0.55          | 0.014  |
| 9                         | 1.83 | Hypoxanthin                                                                 | 136.0384         | 1.22     | 0.80          | 0.001  |
| 10                        | 1.59 | Isophorone                                                                  | 138.1043         | 5.11     | -1.86         | 0.006  |
| 11                        | 1.24 | Sulfurol                                                                    | 143.0405         | 1.66     | 0.51          | 0.042  |
| 12                        | 1.23 | Coumarin                                                                    | 146.0366         | 5.68     | -1.44         | 0.045  |
| 13                        | 2.02 | afegostat                                                                   | 147.0897         | 1.10     | 1.07          | <0.001 |
| 14                        | 1.51 | Cinnamic acid                                                               | 148.0522         | 3.90     | -1.72         | 0.011  |
| 15                        | 1.31 | 3-Phenylpropanoic acid                                                      | 150.0677         | 4.47     | -1.32         | 0.030  |
| 16                        | 1.71 | Guanine                                                                     | 151.0492         | 1.21     | 1.40          | 0.003  |
| 17                        | 1.44 | Xanthine                                                                    | 152.0334         | 1.19     | 1.25          | 0.016  |
| 18                        | 1.67 | DL-Histidine                                                                | 155.0695         | 0.87     | 1.26          | 0.004  |
| 19                        | 1.23 | Safrole                                                                     | 162.0678         | 5.22     | -1.15         | 0.045  |
| 20                        | 1.52 | DL-Phenylalanine                                                            | 165.0789         | 2.00     | 0.64          | 0.010  |
| 21                        | 1.57 | trans-geranic acid                                                          | 168.1148         | 4.74     | -1.94         | 0.008  |
| 22                        | 1.49 | Propylparaben                                                               | 180.0785         | 3.90     | -1.74         | 0.012  |
| 23                        | 1.63 | (2R,3S)-3-Hydroxy-8-methyl-8-azabicyclo[3.2.1]octane-2-carboxylic acid      | 185.1049         | 3.92     | -1.85         | 0.005  |
| 24                        | 1.45 | 2,4,5-Trimethoxybenzaldehyde                                                | 196.0731         | 4.47     | -1.68         | 0.015  |
| 25                        | 1.38 | Methyl (1S,2S,7aS)-2-hydroxy-2-methylhexahydro-1H-pyrrolizine-1-carboxylate | 199.1210         | 1.29     | -1.93         | 0.022  |
| 26                        | 1.61 | DL-Tryptophan                                                               | 204.0891         | 3.38     | 0.87          | 0.006  |
| 27                        | 1.23 | 4-(Phosphonoxy)-L-threonine                                                 | 215.0196         | 17.13    | -0.58         | 0.045  |
| 28                        | 1.56 | 5,6-Dimethyl-8-isopropenylbicyclo(4.4.0)dec-1-en-3-one                      | 218.1663         | 8.93     | -0.89         | 0.008  |
| 29                        | 1.30 | pantothenic acid                                                            | 219.1107         | 2.30     | 0.62          | 0.032  |
| 30                        | 1.47 | 6-Methoxy-1-pyrenol                                                         | 248.0829         | 7.21     | -1.83         | 0.013  |
| 31                        | 1.70 | Arabinosylhypoxanthine                                                      | 268.0809         | 1.23     | 0.65          | 0.003  |
| 32                        | 1.62 | 2-Amino-9-pentofuranosyl-1,9-dihydro-6H-purin-6-one                         | 283.0918         | 1.22     | 1.22          | 0.005  |
| 33                        | 1.49 | 8-[(1S,5S)-4-Oxo-5-[(2Z)-2-penten-1-yl]-2-cyclopenten-1-yl]octanoic acid    | 292.2031         | 7.14     | -1.77         | 0.012  |
| 34                        | 1.75 | DErySphinganine                                                             | 301.2978         | 6.43     | 1.01          | 0.002  |
| 35                        | 1.49 | Warfarin                                                                    | 308.1041         | 7.21     | -1.92         | 0.012  |
| 36                        | 1.78 | Phytosphingosine                                                            | 317.2929         | 5.61     | 1.01          | 0.002  |
| 37                        | 1.68 | 2(3H)-Furanone, dihydro-3,4-divanillyl-                                     | 358.1412         | 6.56     | -2.10         | 0.004  |
| 38                        | 1.24 | Cortisol                                                                    | 362.2089         | 4.44     | 0.62          | 0.042  |
| 39                        | 1.42 | 4,6-CHOLESTADIEN-3-ONE                                                      | 382.3226         | 11.46    | -1.61         | 0.018  |
| 40                        | 1.58 | Cholest-4-en-3-one                                                          | 384.3384         | 13.19    | -1.88         | 0.007  |
| 41                        | 1.43 | Gefarnate                                                                   | 400.3330         | 11.87    | -1.52         | 0.017  |
| <b>Negative ion model</b> |      |                                                                             |                  |          |               |        |

|    |      |                                                                        |          |      |       |        |
|----|------|------------------------------------------------------------------------|----------|------|-------|--------|
| 1  | 1.39 | Malondialdehyde                                                        | 72.0213  | 1.29 | -1.03 | 0.013  |
| 2  | 1.23 | 4-hydroxy-5-methyl-3-furanone                                          | 114.0319 | 0.85 | 0.32  | 0.030  |
| 3  | 1.48 | 1-Hexanoic acid                                                        | 116.0839 | 5.11 | -1.79 | 0.007  |
| 4  | 1.30 | Benzoic acid                                                           | 122.0370 | 3.83 | -0.82 | 0.021  |
| 5  | 1.35 | Itaconic acid                                                          | 130.0269 | 0.91 | -1.21 | 0.016  |
| 6  | 1.27 | (Hydroxyethyl)methacrylate                                             | 130.0632 | 3.76 | 0.74  | 0.024  |
| 7  | 1.54 | (±)-Malic Acid                                                         | 134.0218 | 0.92 | 0.75  | 0.004  |
| 8  | 1.36 | Dimethyl fumarate                                                      | 144.0426 | 0.85 | 0.36  | 0.014  |
| 9  | 1.23 | Ethyl levulinate                                                       | 144.0789 | 4.41 | -0.77 | 0.031  |
| 10 | 1.69 | Valproic acid                                                          | 144.1153 | 4.40 | -1.79 | 0.001  |
| 11 | 1.55 | alpha-Ketoglutaric acid                                                | 146.0219 | 0.94 | -1.69 | 0.004  |
| 12 | 1.14 | DL-Glutamine                                                           | 146.0695 | 0.85 | 0.38  | 0.047  |
| 13 | 2.09 | 2,3,4,5-Tetrahydroxypentanal                                           | 150.0532 | 0.89 | 1.95  | <0.001 |
| 14 | 2.13 | pentane-1,2,3,4,5-pentol                                               | 152.0687 | 0.85 | 4.13  | <0.001 |
| 15 | 1.23 | DL-Histidine                                                           | 155.0698 | 0.84 | 0.56  | 0.030  |
| 16 | 1.88 | 5,6-Dihydroxy-1,3-cyclohexadiene-1-carboxylic acid                     | 156.0425 | 0.91 | 1.33  | <0.001 |
| 17 | 1.43 | Diethylpyrocarbonate                                                   | 162.0531 | 0.85 | 0.37  | 0.010  |
| 18 | 1.31 | Safrole                                                                | 162.0682 | 3.47 | -1.21 | 0.020  |
| 19 | 1.19 | Eugenol                                                                | 164.0838 | 4.31 | 0.75  | 0.037  |
| 20 | 1.42 | DL-Phenylalanine                                                       | 165.0791 | 4.79 | -1.31 | 0.010  |
| 21 | 2.00 | Pentonic acid                                                          | 166.0480 | 0.87 | 3.90  | <0.001 |
| 22 | 1.72 | Uric Acid                                                              | 168.0286 | 0.91 | 3.47  | 0.001  |
| 23 | 1.63 | Gallic acid                                                            | 170.0217 | 3.79 | -1.62 | 0.002  |
| 24 | 1.69 | (+)-a(S)-butyr-amido-r-butyrolactone                                   | 171.0897 | 3.61 | -1.99 | 0.001  |
| 25 | 2.02 | 4,5-Dihydroxy-3-oxo-1-cyclohexene-1-carboxylic acid                    | 172.0374 | 0.91 | 1.46  | <0.001 |
| 26 | 1.38 | 3,4,5-Trihydroxy-1-cyclohexenecarboxylic acid                          | 174.0528 | 1.39 | -1.37 | 0.013  |
| 27 | 1.13 | Suberic acid                                                           | 174.0893 | 3.89 | 0.60  | 0.050  |
| 28 | 1.31 | DL-Arginine                                                            | 174.1119 | 0.81 | 0.51  | 0.020  |
| 29 | 1.40 | Vitamin C                                                              | 176.0323 | 0.92 | -1.43 | 0.012  |
| 30 | 1.52 | D-Glucono-delta-lactone                                                | 178.0478 | 1.32 | -1.57 | 0.005  |
| 31 | 1.25 | Hexose                                                                 | 180.0636 | 0.89 | 0.41  | 0.028  |
| 32 | 1.52 | MHPG                                                                   | 184.0736 | 3.68 | -1.60 | 0.005  |
| 33 | 1.44 | (2R,3S)-3-Hydroxy-8-methyl-8-azabicyclo[3.2.1]octane-2-carboxylic acid | 185.1052 | 3.92 | -1.61 | 0.009  |
| 34 | 1.50 | 1,3,3-Trimethyl-2-oxabicyclo[2.2.2]octane-6,7-diol                     | 186.1257 | 5.11 | -1.54 | 0.006  |
| 35 | 1.65 | Ethyl benzoylacetate                                                   | 192.0786 | 4.09 | -1.56 | 0.002  |
| 36 | 1.36 | Metirosine                                                             | 195.0896 | 6.50 | 0.56  | 0.015  |
| 37 | 1.62 | 2,4,5-Trimethoxybenzaldehyde                                           | 196.0735 | 3.68 | -1.83 | 0.002  |
| 38 | 1.24 | 5-Hydroxy-6-methyl-3,4-pyridinedicarboxylic acid                       | 197.0323 | 4.41 | 0.93  | 0.029  |
| 39 | 1.76 | (2Z)-2-(2-Ethoxy-2-oxoethylidene)succinic acid                         | 202.0477 | 3.79 | -1.85 | 0.001  |
| 40 | 1.18 | 3-C-Carboxy-2,4-dideoxy-2-methylpentaric acid                          | 206.0425 | 1.42 | 0.69  | 0.038  |
| 41 | 1.23 | DL-Thioctic acid                                                       | 206.0427 | 0.91 | -0.94 | 0.030  |
| 42 | 1.78 | Ibuprofen                                                              | 206.1305 | 5.83 | 2.59  | 0.001  |
| 43 | 1.31 | (2E)-3-(3,4-Dimethoxyphenyl)acrylic acid                               | 208.0735 | 5.06 | -1.59 | 0.020  |
| 44 | 1.24 | QV1MVO1R                                                               | 209.0688 | 3.86 | -1.09 | 0.029  |
| 45 | 1.28 | N-(3-Amino-4-methyl-5-nitrophenyl)acetamide                            | 209.0802 | 0.89 | -1.59 | 0.024  |

|    |      |                                                                                              |          |       |       |        |
|----|------|----------------------------------------------------------------------------------------------|----------|-------|-------|--------|
| 46 | 1.46 | 3-(4-Hydroxy-3-methoxyphenyl)-2-oxopropanoic acid                                            | 210.0528 | 3.47  | -1.30 | 0.008  |
| 47 | 1.35 | Butyl vanillyl ether                                                                         | 210.1255 | 5.39  | -1.53 | 0.016  |
| 48 | 1.65 | (3-Oxo-2-pentylcyclopentyl)acetic acid                                                       | 212.1413 | 5.89  | -1.71 | 0.002  |
| 49 | 1.53 | (2R,3S)-2,3,4-Trihydroxy-3-methylbutyl dihydrogen phosphate                                  | 216.0402 | 1.40  | 1.02  | 0.005  |
| 50 | 2.19 | meprobamate                                                                                  | 218.1266 | 0.77  | 5.46  | <0.001 |
| 51 | 1.21 | 4-Amino-3-[(1-carboxyvinyl)oxy]-1,5-cyclohexadiene-1-carboxylic acid                         | 225.0636 | 3.77  | -0.94 | 0.034  |
| 52 | 1.22 | Traumatic Acid                                                                               | 228.1361 | 4.73  | -0.93 | 0.031  |
| 53 | 1.13 | para-Tolyl octanoate                                                                         | 234.1620 | 7.59  | 0.49  | 0.049  |
| 54 | 1.37 | amiloxate                                                                                    | 248.1413 | 6.62  | -1.35 | 0.014  |
| 55 | 1.50 | Gemfibrozil                                                                                  | 250.1568 | 6.39  | -1.77 | 0.006  |
| 56 | 1.18 | Cuauthemone                                                                                  | 252.1726 | 6.97  | -0.81 | 0.039  |
| 57 | 1.37 | Palmitelaidic acid                                                                           | 254.2246 | 7.36  | -0.87 | 0.014  |
| 58 | 1.25 | Palmitic acid                                                                                | 256.2404 | 7.65  | 0.49  | 0.028  |
| 59 | 1.19 | (±)-(2E)-Absciscic acid                                                                      | 264.1360 | 4.62  | -1.51 | 0.036  |
| 60 | 1.61 | Methyl (4R)-4-[(2R)-6-methyl-4-oxo-5-hepten-2-yl]-1-cyclohexene-1-carboxylate                | 264.1725 | 6.96  | -1.51 | 0.003  |
| 61 | 1.60 | 3-methoxy-4-methyl-5-(3-methyl-2-butenyloxy)-1,2-benzenedimethanol                           | 266.1517 | 4.96  | -1.29 | 0.003  |
| 62 | 1.59 | Arabinosylhypoxanthine                                                                       | 268.0809 | 0.92  | 0.67  | 0.003  |
| 63 | 1.32 | Autumnolide                                                                                  | 280.1309 | 4.55  | -1.48 | 0.019  |
| 64 | 1.62 | Artemisinin                                                                                  | 282.1465 | 4.82  | -1.63 | 0.002  |
| 65 | 1.73 | Oleic acid                                                                                   | 282.2559 | 10.93 | -0.82 | 0.001  |
| 66 | 1.51 | Wogonin                                                                                      | 284.0684 | 6.05  | -1.61 | 0.005  |
| 67 | 1.14 | 9-Pentofuranosyl-3,9-dihydro-1H-purine-2,6-dione                                             | 284.0755 | 1.34  | 0.82  | 0.048  |
| 68 | 1.45 | Stearic acid                                                                                 | 284.2715 | 9.06  | 0.58  | 0.008  |
| 69 | 1.36 | 2,5-Dihydroxy-3-undecyl-1,4-benzoquinone                                                     | 294.1830 | 6.45  | 0.44  | 0.015  |
| 70 | 1.29 | 13-KODE                                                                                      | 294.2194 | 7.72  | -1.70 | 0.022  |
| 71 | 1.16 | Dihomo-gamma-linolenic acid                                                                  | 306.2558 | 10.63 | -1.44 | 0.043  |
| 72 | 1.71 | Progesterone                                                                                 | 314.2246 | 7.78  | -1.29 | 0.001  |
| 73 | 1.36 | 9,10-Dihydroxyoctadecanoic acid                                                              | 316.2613 | 6.12  | 0.69  | 0.015  |
| 74 | 1.21 | 13-Hydroxykaur-16-en-18-oic acid                                                             | 318.2196 | 7.79  | -1.34 | 0.034  |
| 75 | 1.29 | Ethyl eicosapentaenoic acid                                                                  | 330.2559 | 10.29 | -0.95 | 0.022  |
| 76 | 1.48 | (2E)-3-(4-Hydroxyphenyl)-1-[2,4,6-trihydroxy-3-(3-methyl-2-buten-1-yl)phenyl]-2-propen-1-one | 340.1308 | 5.90  | -2.06 | 0.007  |
| 77 | 1.40 | Nifedipine                                                                                   | 346.1162 | 3.72  | -1.36 | 0.011  |
| 78 | 1.55 | Ginkgoic acid                                                                                | 346.2505 | 8.98  | -1.04 | 0.004  |
| 79 | 1.29 | (+)-Ingenol                                                                                  | 348.1933 | 6.45  | -1.38 | 0.022  |
| 80 | 1.54 | Dinoprostone                                                                                 | 352.2245 | 6.12  | -2.12 | 0.004  |
| 81 | 1.21 | (2E)-3-(4-Hydroxy-3-methoxyphenyl)-2-propen-1-yl (2E)-3-(4-hydroxy-3-methoxyphenyl)acrylate  | 356.1258 | 6.30  | -1.62 | 0.033  |
| 82 | 1.49 | 2(3H)-Furanone, dihydro-3,4-divanillyl-                                                      | 358.1414 | 4.78  | -1.71 | 0.007  |
| 83 | 1.26 | Protirelin                                                                                   | 362.1701 | 5.82  | 1.04  | 0.026  |
| 84 | 1.24 | Cortisol                                                                                     | 362.2089 | 5.16  | -1.11 | 0.029  |
| 85 | 1.34 | Sphingosine 1-phosphate                                                                      | 379.2484 | 6.74  | 0.75  | 0.016  |
| 86 | 1.84 | (3beta,5alpha,6beta)-Cholestane-3,5,6-triol                                                  | 420.3597 | 11.28 | -2.19 | <0.001 |

|    |      |                        |          |       |      |       |
|----|------|------------------------|----------|-------|------|-------|
| 87 | 1.52 | Jervine                | 425.2924 | 5.93  | 3.45 | 0.005 |
| 88 | 1.14 | Testosterone decanoate | 442.3441 | 12.20 | 0.68 | 0.047 |
| 89 | 1.46 | Azelnidipine           | 582.2467 | 5.36  | 1.56 | 0.008 |



**Table S6.** Differential metabolites between FM and NSP groups.

| No.                       | VIP  | Name                                                                        | Molecular Weight | RT [min] | Fold NSP/FM | T test |
|---------------------------|------|-----------------------------------------------------------------------------|------------------|----------|-------------|--------|
| <b>Positive ion model</b> |      |                                                                             |                  |          |             |        |
| 1                         | 1.21 | Valeronitrile                                                               | 83.0700          | 0.77     | -0.59       | 0.022  |
| 2                         | 1.10 | Phenol                                                                      | 94.0400          | 2.00     | 0.60        | 0.040  |
| 3                         | 1.08 | Uracil                                                                      | 112.0300         | 1.18     | 0.65        | 0.044  |
| 4                         | 1.07 | Vigabatrin                                                                  | 129.0800         | 0.78     | -0.59       | 0.045  |
| 5                         | 1.06 | Creatine                                                                    | 131.0700         | 0.89     | 0.74        | 0.049  |
| 6                         | 1.74 | Isophorone                                                                  | 138.1000         | 5.11     | -3.16       | <0.001 |
| 7                         | 1.26 | Sulfurol                                                                    | 143.0400         | 1.66     | 0.72        | 0.016  |
| 8                         | 1.06 | methyl hygrate betaine                                                      | 143.0900         | 0.91     | 1.26        | 0.048  |
| 9                         | 1.65 | Coumarin                                                                    | 146.0400         | 5.68     | -3.12       | 0.001  |
| 10                        | 1.07 | DL-Lysine                                                                   | 146.1100         | 0.78     | -0.59       | 0.046  |
| 11                        | 1.48 | afegostat                                                                   | 147.0900         | 1.10     | 0.82        | 0.003  |
| 12                        | 1.79 | Cinnamic acid                                                               | 148.0500         | 3.90     | -3.27       | <0.001 |
| 13                        | 1.70 | 3-Phenylpropanoic acid                                                      | 150.0700         | 4.47     | -2.76       | <0.001 |
| 14                        | 1.06 | Guanine                                                                     | 151.0500         | 1.21     | 1.41        | 0.049  |
| 15                        | 1.25 | DL-Histidine                                                                | 155.0700         | 0.87     | 1.14        | 0.017  |
| 16                        | 1.66 | Safrole                                                                     | 162.0700         | 5.22     | -2.77       | 0.001  |
| 17                        | 1.79 | trans-geranic acid                                                          | 168.1100         | 4.74     | -4.28       | <0.001 |
| 18                        | 1.78 | Propylparaben                                                               | 180.0800         | 3.90     | -3.39       | <0.001 |
| 19                        | 1.84 | (2R,3S)-3-Hydroxy-8-methyl-8-azabicyclo[3.2.1]octane-2-carboxylic acid      | 185.1000         | 3.92     | -3.94       | <0.001 |
| 20                        | 1.71 | 2,4,5-Trimethoxybenzaldehyde                                                | 196.0700         | 4.47     | -3.20       | <0.001 |
| 21                        | 1.44 | 2-Acetyl-6-hydroxy-7-(hydroxymethyl)-1,5,6,7-tetrahydro-4H-azepin-4-one     | 199.0800         | 1.17     | -2.99       | 0.005  |
| 22                        | 1.55 | Methyl (1S,2S,7aS)-2-hydroxy-2-methylhexahydro-1H-pyrrolizine-1-carboxylate | 199.1200         | 1.29     | -4.08       | 0.002  |
| 23                        | 1.27 | DL-Tryptophan                                                               | 204.0900         | 3.38     | 0.75        | 0.015  |
| 24                        | 1.22 | 5,6-Dimethyl-8-isopropenylbicyclo(4.4.0)dec-1-en-3-one                      | 218.1700         | 8.93     | -0.75       | 0.020  |
| 25                        | 1.66 | 6-Methoxy-1-pyrenol                                                         | 248.0800         | 7.21     | -3.15       | 0.001  |
| 26                        | 1.63 | N~6~-(5-Oxo-D-isoleucyl)-L-lysine                                           | 273.1700         | 3.74     | -2.64       | 0.001  |
| 27                        | 1.51 | 8-[(1S,5S)-4-Oxo-5-[(2Z)-2-penten-1-yl]-2-cyclopenten-1-yl]octanoic acid    | 292.2000         | 7.14     | -2.15       | 0.002  |
| 28                        | 1.06 | 13-KODE                                                                     | 294.2200         | 4.58     | 0.70        | 0.048  |
| 29                        | 1.60 | DErySphinganine                                                             | 301.3000         | 6.43     | 1.04        | 0.001  |
| 30                        | 1.64 | Warfarin                                                                    | 308.1000         | 7.21     | -3.27       | 0.001  |
| 31                        | 1.58 | Phytosphingosine                                                            | 317.2900         | 5.61     | 0.98        | 0.001  |
| 32                        | 1.64 | 2(3H)-Furanone, dihydro-3,4-divanillyl-                                     | 358.1400         | 6.56     | -2.94       | 0.001  |
| 33                        | 1.76 | 4,6-CHOLESTADIEN-3-ONE                                                      | 382.3200         | 11.46    | -3.14       | <0.001 |
| 34                        | 1.80 | Cholest-4-en-3-one                                                          | 384.3400         | 11.53    | -3.52       | <0.001 |
| 35                        | 1.71 | Gefarnate                                                                   | 400.3300         | 11.87    | -3.20       | <0.001 |
| <b>Negative ion model</b> |      |                                                                             |                  |          |             |        |
| 1                         | 1.55 | Malondialdehyde                                                             | 72.02131         | 1.29     | -1.60       | <0.001 |
| 2                         | 1.60 | 4-hydroxy-5-methyl-3-furanone                                               | 114.03193        | 1.44     | -2.01       | <0.001 |
| 3                         | 1.68 | 1-Hexanoic acid                                                             | 116.08393        | 5.11     | -3.82       | <0.001 |
| 4                         | 1.58 | Benzoic acid                                                                | 122.03699        | 3.83     | -1.40       | <0.001 |
| 5                         | 1.40 | Itaconic acid                                                               | 130.02689        | 0.91     | -1.54       | 0.002  |

|    |      |                                                     |           |      |       |        |
|----|------|-----------------------------------------------------|-----------|------|-------|--------|
| 6  | 1.18 | (Hydroxyethyl)methacrylate                          | 130.06319 | 3.76 | 0.71  | 0.011  |
| 7  | 1.49 | Ethyl levulinate                                    | 144.0789  | 4.41 | -1.46 | 0.001  |
| 8  | 1.63 | Valproic acid                                       | 144.11526 | 4.40 | -2.66 | <0.001 |
| 9  | 1.63 | alpha-Ketoglutaric acid                             | 146.02185 | 0.94 | -2.63 | <0.001 |
| 10 | 1.86 | 2,3,4,5-Tetrahydroxypentanal                        | 150.05317 | 0.89 | 1.78  | <0.001 |
| 11 | 1.83 | pentane-1,2,3,4,5-pentol                            | 152.0687  | 0.85 | 4.29  | <0.001 |
| 12 | 1.51 | 5,6-Dihydroxy-1,3-cyclohexadiene-1-carboxylic acid  | 156.04251 | 0.91 | 1.16  | <0.001 |
| 13 | 1.58 | Z-Maleylacetic acid                                 | 158.02168 | 1.43 | -2.35 | <0.001 |
| 14 | 1.64 | Safrole                                             | 162.06822 | 3.47 | -2.05 | <0.001 |
| 15 | 1.02 | Eugenol                                             | 164.08378 | 4.31 | 0.73  | 0.032  |
| 16 | 1.57 | DL-Phenylalanine                                    | 165.0791  | 4.79 | -2.07 | <0.001 |
| 17 | 1.70 | Pentonic acid                                       | 166.04801 | 0.87 | 4.05  | <0.001 |
| 18 | 1.65 | Uric Acid                                           | 168.02861 | 0.91 | 2.87  | <0.001 |
| 19 | 1.10 | trans-geranic acid                                  | 168.11515 | 4.48 | -0.91 | 0.019  |
| 20 | 1.61 | Gallic acid                                         | 170.02166 | 3.79 | -2.37 | <0.001 |
| 21 | 1.70 | 4,5-Dihydroxy-3-oxo-1-cyclohexene-1-carboxylic acid | 172.03741 | 0.91 | 1.41  | <0.001 |
| 22 | 1.65 | 3,4,5-Trihydroxy-1-cyclohexenecarboxylic acid       | 174.05276 | 1.39 | -2.35 | <0.001 |
| 23 | 1.05 | DL-Arginine                                         | 174.11185 | 0.81 | 0.53  | 0.026  |
| 24 | 1.68 | Vitamin C                                           | 176.03231 | 1.08 | -2.91 | <0.001 |
| 25 | 1.61 | D-Glucono-delta-lactone                             | 178.04783 | 1.32 | -2.24 | <0.001 |
| 26 | 1.32 | methyl eugenol                                      | 178.09944 | 5.67 | 0.57  | 0.003  |
| 27 | 1.70 | MHPG                                                | 184.07358 | 3.68 | -2.97 | <0.001 |
| 28 | 1.62 | 1,3,3-Trimethyl-2-oxabicyclo[2.2.2]octane-6,7-diol  | 186.12568 | 5.11 | -2.65 | <0.001 |
| 29 | 1.39 | (Z)-2-Butene-1,2,3-tricarboxylic acid               | 188.03236 | 0.92 | -2.41 | 0.002  |
| 30 | 1.62 | Ethyl benzoylacetate                                | 192.07864 | 4.09 | -2.12 | <0.001 |
| 31 | 1.32 | ibufenac                                            | 192.115   | 5.88 | 1.15  | 0.003  |
| 32 | 1.56 | 2,4,5-Trimethoxybenzaldehyde                        | 196.0735  | 3.68 | -2.62 | <0.001 |
| 33 | 1.46 | 5-Hydroxy-6-methyl-3,4-pyridinedicarboxylic acid    | 197.03233 | 4.41 | 1.21  | 0.001  |
| 34 | 1.66 | (2Z)-2-(2-Ethoxy-2-oxoethylidene)succinic acid      | 202.04769 | 3.79 | -2.83 | <0.001 |
| 35 | 1.50 | 1-Oxo-1,2,4-butanetricarboxylic acid                | 204.02723 | 0.91 | -1.23 | <0.001 |
| 36 | 1.09 | DL-Tryptophan                                       | 204.08982 | 3.35 | 0.49  | 0.021  |
| 37 | 1.04 | 3-C-Carboxy-2,4-dideoxy-2-methylpentaric acid       | 206.04249 | 1.42 | 0.74  | 0.028  |
| 38 | 1.43 | DL-Thioctic acid                                    | 206.04271 | 0.91 | -1.74 | 0.001  |
| 39 | 1.37 | Ibuprofen                                           | 206.13052 | 5.83 | 1.82  | 0.002  |
| 40 | 1.45 | (2E)-3-(3,4-Dimethoxyphenyl)acrylic acid            | 208.07353 | 5.06 | -3.03 | 0.001  |
| 41 | 1.55 | N-(3-Amino-4-methyl-5-nitrophenyl)acetamide         | 209.08018 | 0.89 | -3.68 | <0.001 |
| 42 | 1.21 | 3-(4-Hydroxy-3-methoxyphenyl)-2-oxopropanoic acid   | 210.05278 | 3.47 | -1.31 | 0.009  |
| 43 | 1.69 | Butyl vanillyl ether                                | 210.12549 | 5.39 | -3.37 | <0.001 |
| 44 | 1.61 | (3-Oxo-2-pentylcyclopentyl)acetic acid              | 212.14125 | 5.89 | -2.52 | <0.001 |
| 45 | 1.13 | Diethyl phthalate                                   | 222.08903 | 4.80 | -0.59 | 0.016  |
| 46 | 1.43 | Methyl Jasmonate                                    | 224.14118 | 5.44 | -2.42 | 0.001  |
| 47 | 1.24 | Traumatic Acid                                      | 228.13613 | 4.73 | -1.26 | 0.007  |
| 48 | 1.18 | para-Tolyl octanoate                                | 234.16197 | 7.59 | 0.44  | 0.011  |
| 49 | 1.28 | 1-Allyl-2,3,4,5-tetramethoxybenzene                 | 238.12049 | 4.59 | -1.27 | 0.005  |
| 50 | 1.57 | amiloxate                                           | 248.14125 | 6.62 | -2.47 | <0.001 |
| 51 | 1.45 | Trolox                                              | 250.12041 | 5.59 | 0.85  | 0.001  |

|    |      |                                                                                                                  |           |       |       |        |
|----|------|------------------------------------------------------------------------------------------------------------------|-----------|-------|-------|--------|
| 52 | 1.70 | Gemfibrozil                                                                                                      | 250.15682 | 6.39  | -3.54 | <0.001 |
| 53 | 1.27 | Homosalate                                                                                                       | 262.1569  | 5.99  | -2.22 | 0.005  |
| 54 | 1.49 | (±)-(2E)-Absciscic acid                                                                                          | 264.13604 | 4.62  | -3.33 | 0.001  |
| 55 | 1.67 | Methyl (4R)-4-[(2R)-6-methyl-4-oxo-5-hepten-2-yl]-1-cyclohexene-1-carboxylate                                    | 264.17248 | 6.96  | -2.15 | <0.001 |
| 56 | 1.35 | 16-hydroxypalmitic acid                                                                                          | 272.23516 | 8.98  | -1.00 | 0.003  |
| 57 | 1.09 | Oleic acid                                                                                                       | 282.25589 | 10.93 | -0.53 | 0.020  |
| 58 | 1.59 | Wogonin                                                                                                          | 284.06835 | 6.05  | -2.34 | <0.001 |
| 59 | 1.12 | Stearic acid                                                                                                     | 284.27153 | 9.06  | 0.63  | 0.017  |
| 60 | 1.67 | 2,5-Dihydroxy-3-undecyl-1,4-benzoquinone                                                                         | 294.18298 | 6.45  | 1.93  | <0.001 |
| 61 | 1.44 | 13-KODE                                                                                                          | 294.21939 | 7.72  | -2.69 | 0.001  |
| 62 | 1.74 | 5,6-Dihydroretinoic acid                                                                                         | 302.22441 | 6.91  | 0.43  | <0.001 |
| 63 | 1.10 | Dihomo-gamma-linolenic acid                                                                                      | 306.25582 | 10.63 | -1.77 | 0.020  |
| 64 | 1.09 | (9S,10E,12Z,15Z)-9-Hydroperoxy-10,12,15-octadecatrienoic acid                                                    | 310.21437 | 7.14  | -2.01 | 0.020  |
| 65 | 1.54 | Progesterone                                                                                                     | 314.22438 | 6.17  | -2.97 | <0.001 |
| 66 | 1.06 | 17-(Hydroxymethyl)-12-methyl-8-oxapentacyclo[14.2.1.0~1,13~.0~4,12~.0~5,9~]nonadeca-5(9),6-dien-17-ol            | 316.20381 | 7.32  | -2.51 | 0.024  |
| 67 | 1.31 | 9,10-Dihydroxyoctadecanoic acid                                                                                  | 316.26123 | 7.99  | 0.68  | 0.004  |
| 68 | 1.45 | 13-Hydroxykaur-16-en-18-oic acid                                                                                 | 318.21959 | 7.79  | -2.46 | 0.001  |
| 69 | 1.22 | Efloxate                                                                                                         | 324.09963 | 6.30  | -1.79 | 0.008  |
| 70 | 1.33 | (10E,15Z)-9,12,13-Trihydroxy-10,15-octadecadienoic acid                                                          | 328.22492 | 6.79  | -0.88 | 0.003  |
| 71 | 1.00 | Retinyl acetate                                                                                                  | 328.24019 | 7.44  | 0.23  | 0.035  |
| 72 | 1.12 | Ethyl eicosapentaenoic acid                                                                                      | 330.25575 | 7.93  | 0.51  | 0.017  |
| 73 | 1.38 | 15,16-Epoxy-6b,9-dihydroxy-8bH-labda-13(16),14-dien-19-oic Acid g-332.19844 Lactone                              | 332.19844 | 4.44  | 0.85  | 0.002  |
| 74 | 1.12 | Diethyl phthalate                                                                                                | 334.21422 | 7.28  | -1.73 | 0.016  |
| 75 | 1.64 | Nifedipine                                                                                                       | 346.11622 | 3.72  | -2.65 | <0.001 |
| 76 | 1.58 | Ginkgoic acid                                                                                                    | 346.25053 | 8.98  | -1.53 | <0.001 |
| 77 | 1.65 | (+)-Ingenol                                                                                                      | 348.19332 | 6.45  | -2.67 | <0.001 |
| 78 | 1.39 | Dinoprostone                                                                                                     | 352.22484 | 7.45  | -3.03 | 0.002  |
| 79 | 1.74 | 2(3H)-Furanone,dihydro-3,4-divanillyl-                                                                           | 358.14141 | 4.60  | -3.38 | <0.001 |
| 80 | 1.51 | Cortisol                                                                                                         | 362.20888 | 5.16  | -1.89 | <0.001 |
| 81 | 1.05 | (3R,4S,5R,6S,7S,9R,11R,12S,13R,14R)-4,6,12-Trihydroxy-3,5,7,9,11,13,14-heptamethyloxacyclotetradecane-2,10-dione | 372.25095 | 7.99  | 0.60  | 0.027  |
| 82 | 1.52 | (+)-Riboflavin                                                                                                   | 376.13782 | 3.63  | 1.14  | <0.001 |
| 83 | 1.16 | Sphingosine 1-phosphate                                                                                          | 379.24835 | 6.74  | 1.01  | 0.013  |
| 84 | 1.66 | (3beta,5alpha,6beta)-Cholestane-3,5,6-triol                                                                      | 420.35973 | 11.28 | -2.81 | <0.001 |
